# Supplementary material for: Disruption of cholesterol homeostasis triggers periodontal inflammation and alveolar bone loss
Source: PubMed Central journal article supplement (PMC10767058; doi:10.1038/s12276-023-01122-w), 2023-12-01
Supplement: 12276_2023_1122_MOESM1_ESM.pdf [file 12276_2023_1122_MOESM1_ESM.pdf]

## **Supplementary Information**

### **Disruption of cholesterol homeostasis triggers periodontal inflammation and alveolar bone loss**

Thanh-Tam Tran<sup>1,2</sup>, Gyuseok Lee<sup>1,2</sup>, Yun Hyun Huh<sup>3</sup>, Ki-Ho Chung<sup>4</sup>, Sun Young Lee<sup>1</sup>, Ka Hyon Park<sup>1</sup>, Seung Hee Kwon<sup>2</sup>, Min-Suk Kook<sup>5</sup>, Jang-Soo Chun<sup>3</sup>, Jeong-Tae Koh<sup>1,2</sup>, Je-Hwang Ryu<sup>1,2\*</sup>

Supplementary Figure 1 to 7

Supplementary Table

## Supplementary Figures

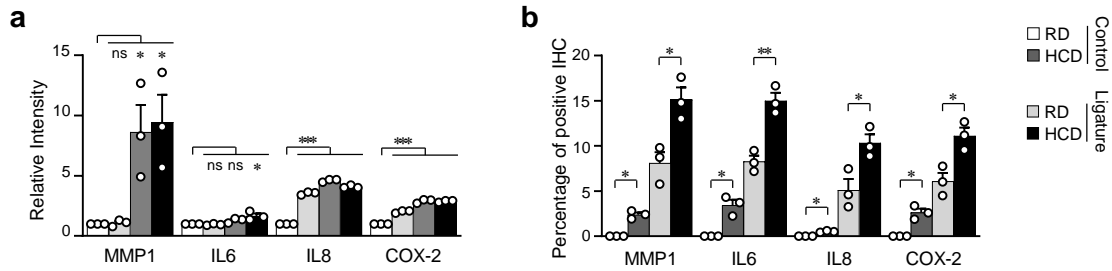

**Supplementary Fig. 1. Quantification of western blot and immunohistochemistry staining results.** **a** Relative intensity of the indicated proteins in human GF treated with cholesterol for 36 h ( $n = 3$ ). **b** Percentage of positive staining for MMP1, IL6, IL8, and COX-2 immunostaining in images from ligature-induced PD mice fed with RD or HCD ( $n = 3$ ). Values are presented as mean  $\pm$  SEM via two-tailed  $t$ -test (**b**) and one-way ANOVA with Tukey's test (**a**). ( $*P < 0.05$ ,  $**P < 0.01$ ,  $***P < 0.001$ ).

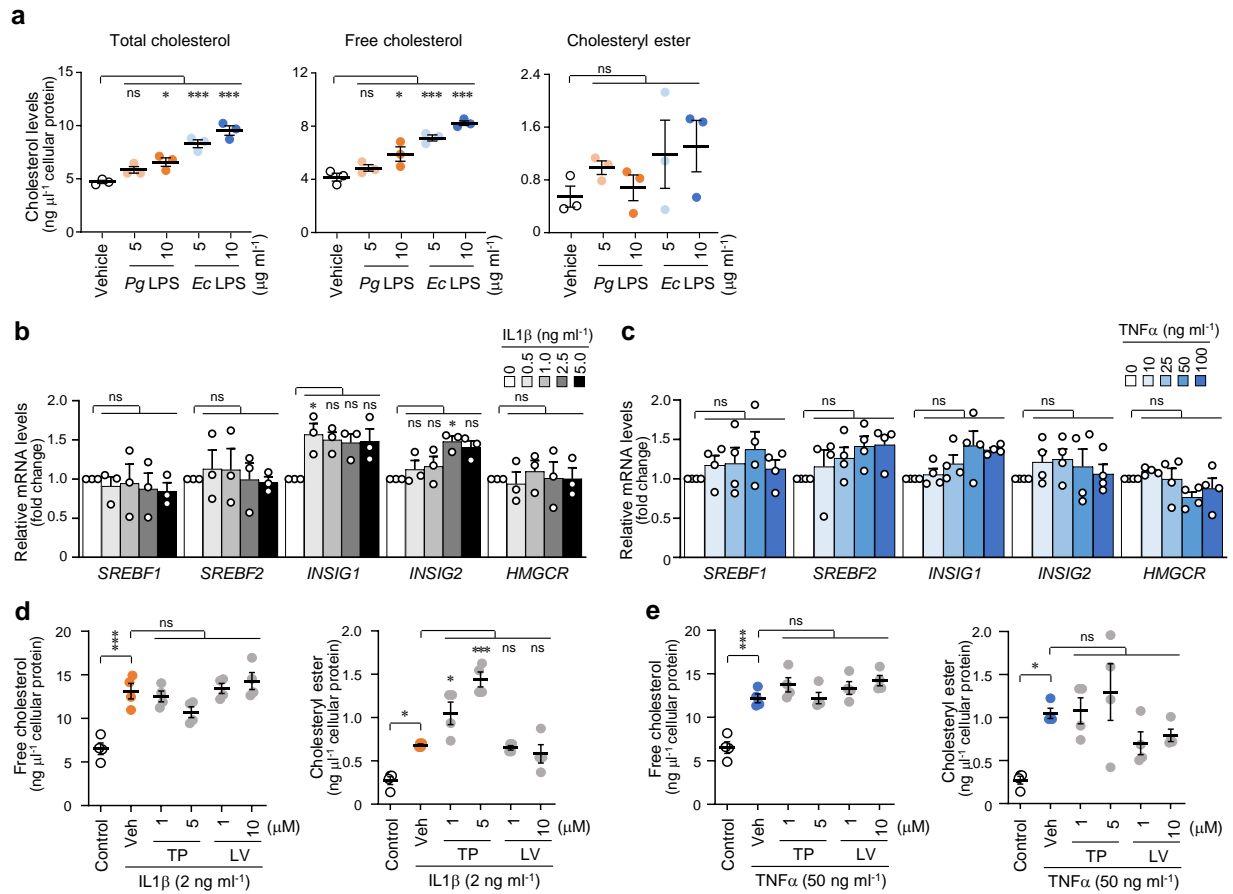

**Supplementary Fig. 2. Expression of cholesterol biosynthesis-related genes and effects of cholesterol biosynthesis inhibitors.** **a** Total cholesterol, free cholesterol, and cholesteryl ester levels in human GF treated with *Pg* LPS or *Ec* LPS for 24 h ( $n = 3$ ). **b, c** qRT-PCR analysis of the indicated genes involved in cholesterol sensing and synthesis in human GF treated with IL1 $\beta$  (**b**) ( $n = 3$ ) or TNF $\alpha$  (**c**) ( $n = 4$ ) for 24 h. **d, e** Cellular levels of free cholesterol and cholesteryl ester in human GF treated with cholesterol synthesis inhibitors (triparanol [TP] and lovastatin [LV]) in the presence of IL1 $\beta$  (2 ng  $\text{ml}^{-1}$ ) (**d**) or TNF $\alpha$  (50 ng  $\text{ml}^{-1}$ ) (**e**) for 24 h ( $n = 4$ ).  $n$  indicates the number of biologically independent samples. Values are presented as mean  $\pm$  SEM with one-way ANOVA and Tukey's test. (\* $P < 0.05$ , \*\* $P < 0.01$ , \*\*\* $P < 0.001$ ).

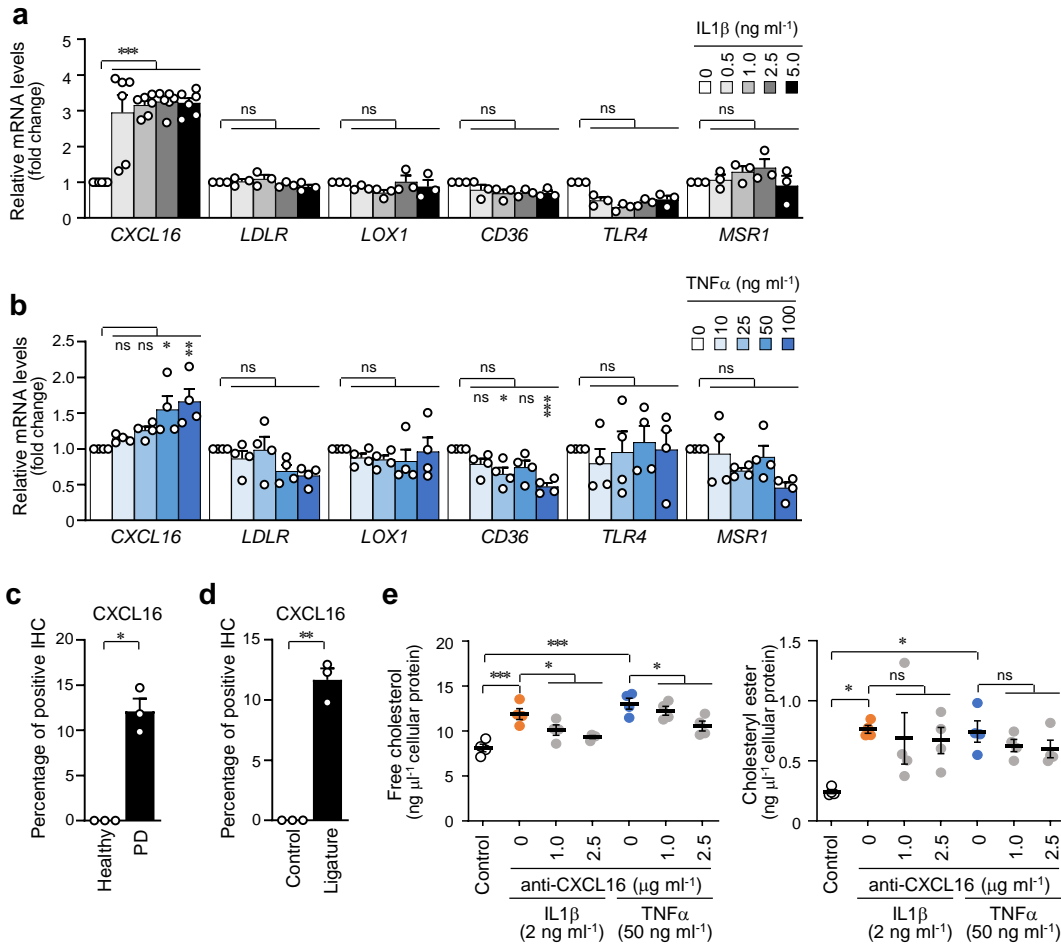

**Supplemental Fig. 3. Upregulation of CXCL16 in inflamed periodontal cells and tissues and CXCL16-mediated increase in cellular cholesterol in GF.** **a, b** Evaluation of mRNA levels of genes involved in cholesterol uptake in human GF treated with IL1 $\beta$  (**a**) or TNF $\alpha$  (**b**) for 24 h ( $n \geq 3$ ). **c, d** Percentage of positive staining intensity of CXCL16 immunostaining of the gingiva from human patients with PD (**c**) and ligature-induced PD mice (**d**) ( $n = 3$ ). **e** Cellular levels of free cholesterol and cholesteryl ester in human GF treated with anti-CXCL16 blocking antibody in the presence of IL1 $\beta$  (2 ng ml $^{-1}$ ) or TNF $\alpha$  (50 ng ml $^{-1}$ ) for 24 h ( $n = 4$ ).  $n$  indicates the number of biologically independent samples. Values are presented as mean  $\pm$  SEM via two-tailed  $t$ -test (**c, d**) and one-way ANOVA and Tukey's test (**a, b, e**). (\* $P < 0.05$ , \*\* $P < 0.01$ , \*\*\* $P < 0.001$ ).

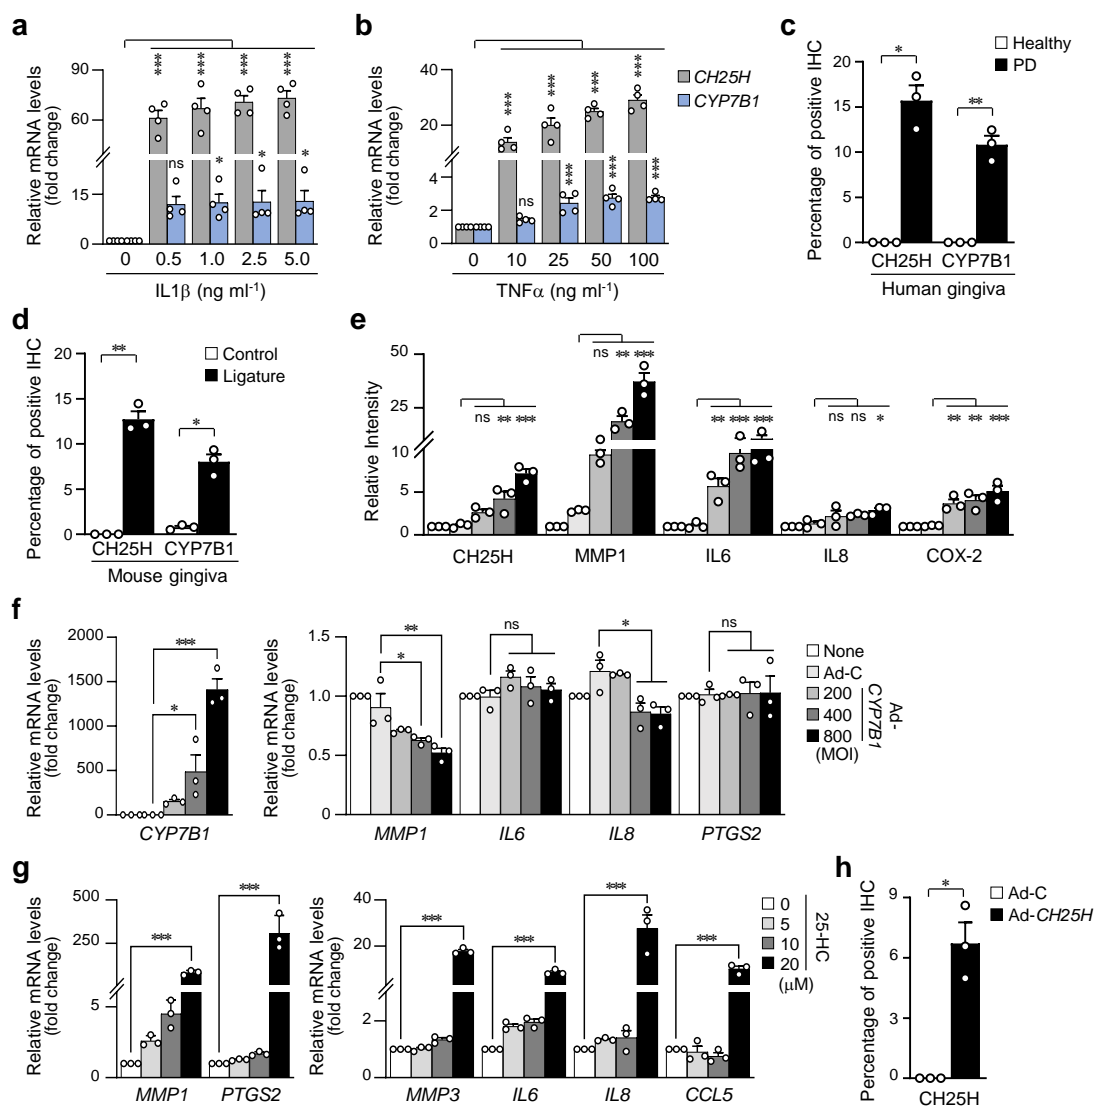

**Supplementary Fig. 4. Upregulation of CH25H and CYP7B1 in PD-mimicking conditions and their functions in PD-associated catabolic gene expression.** **a, b** mRNA levels of *CH25H* and *CYP7B1* in human GF treated with the indicated doses of IL1 $\beta$  or TNF $\alpha$  for 24 h ( $n = 4$ ). **c, d** Graphical representation of percentage of positive staining intensity of CH25H and CYP7B1 immunostaining images in human (**c**) and mouse gingiva (**d**) ( $n = 3$ ). **e** Relative intensities of CH25H, MMP1, IL6, IL8, and PTGS2 western blot images of human GF infected with *CH25H*-overexpressing adenovirus (Ad-*CH25H*;  $n = 3$ ). **f** mRNA levels of *CYP7B1*, *MMP1*, *IL6*, *IL8*, and

*PTGS2* in human GF infected with Ad-*CYP7B1* ( $n = 3$ ). **g** mRNA levels in human GF treated with 25-HC for 48 h ( $n = 3$ ). **h** Percentage of positive staining intensity of CH25H immunostaining images of mouse gingiva injected with an empty virus (Ad-C) or Ad-*Ch25h* ( $1 \times 10^9$  PFU per 5  $\mu$ l) ( $n = 3$ ).  $n$  indicates the number of biologically independent samples. Values are presented as mean  $\pm$  SEM based on two-tailed  $t$ -test (**c**, **d**, **h**) and one way ANOVA and Tukey's test (**a**, **e**, **f**, **g**). (\* $P < 0.05$ , \*\* $P < 0.01$ , \*\*\* $P < 0.001$ ).

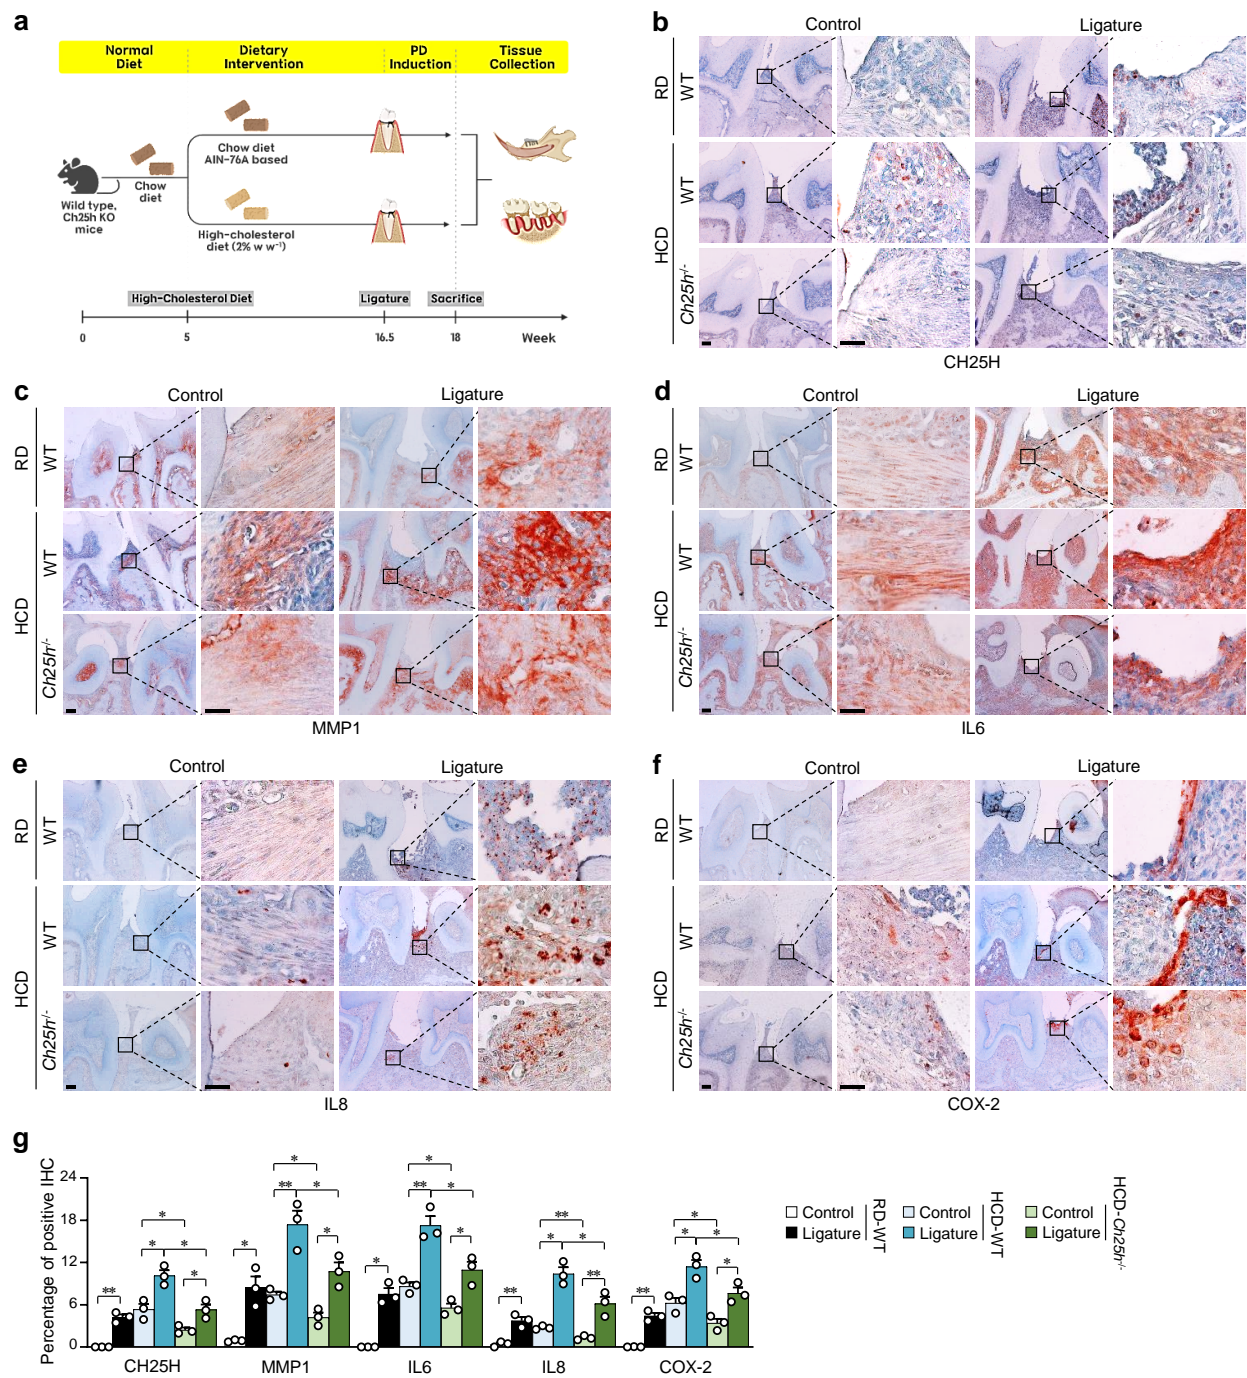

**Supplementary Fig. 5. Alterations in PD-associated protein expression in *Ch25h*<sup>-/-</sup> mice. a** Schematic diagram of experimental ligature-induced PD procedures of mice fed with RD or HCD for 13 weeks. Schematic diagram was created with BioRender.com. **b-f** Representative images of CH25H (**b**), MMP1 (**c**), IL6 (**d**), IL8 (**e**), and COX-2 (**f**) immunostaining from control and ligature-

induced PD gingiva of wild-type (WT) and *Ch25h* knockout (*Ch25h<sup>-/-</sup>*) mice fed RD or HCD for 13 weeks. Scale bar, 100  $\mu\text{m}$  (left), 25  $\mu\text{m}$  (right). **g** Graphical representation of percentage of positive staining intensity of CH25H, MMP1, IL6, IL8, and COX-2 immunostaining images from control and ligature induced PD gingiva of wild-type (WT) and *Ch25h* knockout (*Ch25h<sup>-/-</sup>*) mice fed RD or HCD for 13 weeks ( $n = 3$ ). Values are presented as mean  $\pm$  SEM based on two-tailed *t*-test (**g**). (\* $P < 0.05$ , \*\* $P < 0.01$ , \*\*\* $P < 0.001$ ).



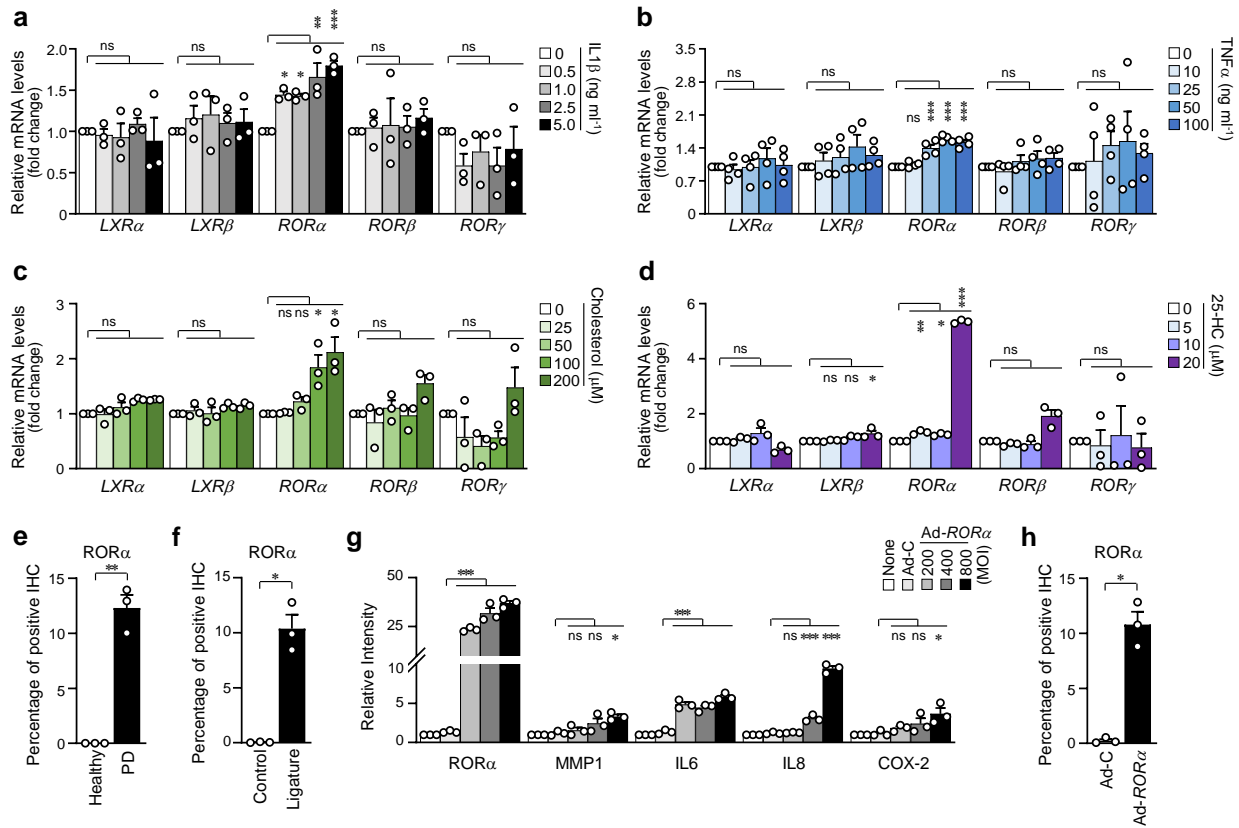

**Supplementary Fig. 6. *RORα* expression is upregulated in PD-mimicking human GF.** a-d qRT-PCR analysis of mRNA levels of nuclear receptors (*LXRα*, *LXRβ*, *RORα*, *RORβ*, *RORγ*) in human GF treated with the indicated doses of IL1β (a), TNFα (b), cholesterol (c), or 25-HC (d) for 24 h ( $n \geq 3$ ). e, f Percentage of positive staining for *RORα* immunostaining in images from human (e) and mouse gingiva (f) ( $n = 3$ ). g Relative intensities of *RORα*, MMP1, IL6, IL8, and PTGS2 western blot images in human GF infected with Ad-*RORα* for 48 h ( $n = 3$ ). h Percentage of positive staining intensity of *RORα* immunostaining images in mouse gingiva injected with an empty virus (Ad-C) or Ad-*Rora* ( $1 \times 10^9$  PFU per 8  $\mu$ l) ( $n = 3$ ).  $n$  indicates the number of biologically independent samples. Values are presented as mean  $\pm$  SEM based on two-tailed  $t$ -test (e, f, h) and one-way ANOVA and Tukey's test (a, b, c, d, g). (\* $P < 0.05$ , \*\* $P < 0.01$ , \*\*\* $P < 0.001$ ).

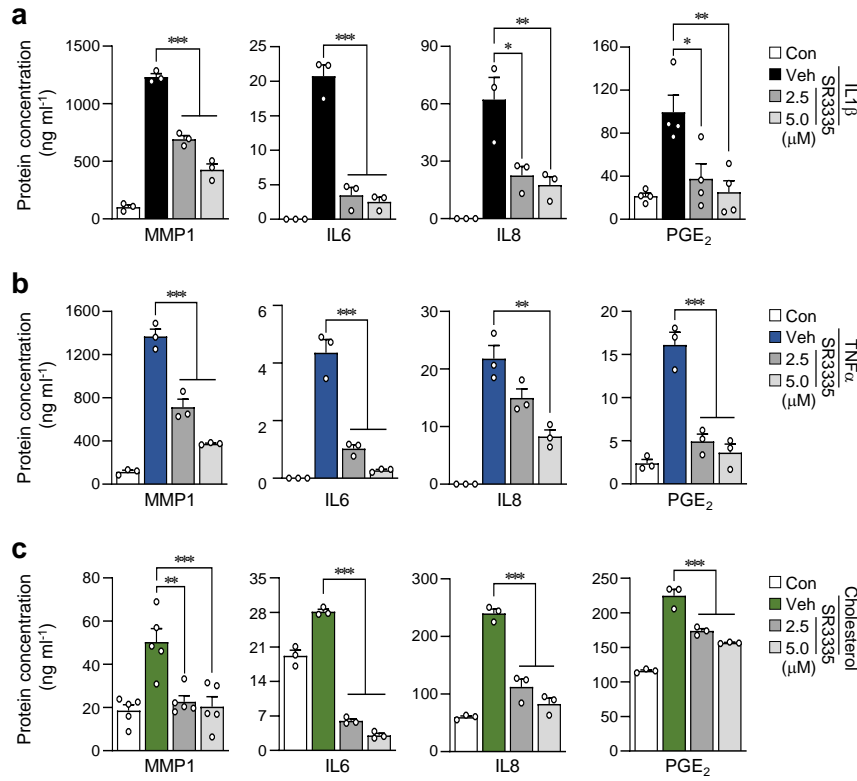

**Supplemental Fig. 7. Blocking of ROR $\alpha$  activation reduced the effects of IL1 $\beta$ , TNF $\alpha$ , and cholesterol on the expression of catabolic factors. a-c** Secretion of MMP1, IL6, and IL8 and production of PGE<sub>2</sub> from human GF treated with the indicated concentrations of SR3335 in the presence of IL1 $\beta$  (2 ng ml<sup>-1</sup>) (a), TNF $\alpha$  (50 ng ml<sup>-1</sup>) (b), and cholesterol (200  $\mu$ M) (c) for 24 h ( $n \geq 3$ ).  $n$  indicates the number of biologically independent samples. Values are presented as mean  $\pm$  SEM based on one-way ANOVA and Tukey's test. (\* $P < 0.05$ , \*\* $P < 0.01$ , \*\*\* $P < 0.001$ ).

**Supplementary Table. PCR primer sequence and PCR condition**

| Gene                          | Strand | Primer sequences                   | Size (bp) | AT (°C) | Origin |
|-------------------------------|--------|------------------------------------|-----------|---------|--------|
| <i>CCL5</i>                   | S      | 5'-GGATCAAGACAGCACGTGGA-3'         | 421       | 60      | Human  |
|                               | AS     | 5'-CGGGTGGGGTAGGATAGTGA-3'         |           |         |        |
| <i>CD36</i>                   | S      | 5'-GAGAACTGTTATGGGGCTAT-3'         | 389       | 60      | Human  |
|                               | AS     | 5'-TTCAACTGGAGAGGCAAAGG-3'         |           |         |        |
| <i>CH25H</i>                  | S      | 5'-ACATCTGGCTTTCCTGGAG-3'          | 139       | 60      | Human  |
|                               | AS     | 5'-TACGGAGCGAAGTTGCAGTT-3'         |           |         |        |
| <i>CYP7B1</i>                 | S      | 5'-TGCTGCAGTCAACAGGTCAA-3'         | 193       | 60      | Human  |
|                               | AS     | 5'-TTTCGCACACAGTAGTCCCC-3'         |           |         |        |
| <i>CXCL16</i>                 | S      | 5'-ATCTGCTTTTCACACTGGGT-3'         | 485       | 60      | Human  |
|                               | AS     | 5'-GAGGGGGAACCATCAGCAAA-3'         |           |         |        |
| <i>GAPDH</i>                  | S      | 5'-GGTGAAGGTCGGAGTCAACG-3'         | 327       | 60      | Human  |
|                               | AS     | 5'-CAAATGAGCCCCAGCCTTCT-3'         |           |         |        |
| <i>HMGCR</i>                  | S      | 5'-TTGGTGATGGGAGCTTGTGT-3'         | 267       | 60      | Human  |
|                               | AS     | 5'-CGAGCCAGGCTTTCACCTTCT-3'        |           |         |        |
| <i>IL6</i>                    | S      | 5'-AGGCTGGACTGCAGGAACTCCTTAAAG-3'  | 421       | 60      | Human  |
|                               | AS     | 5'-CCCTGAGAAAGGAGACATGTAACAAGAG-3' |           |         |        |
| <i>IL8</i>                    | S      | 5'-CTCTCTTGGCAGCCTTCTGATTC-3'      | 254       | 60      | Human  |
|                               | AS     | 5'-AAACTTCTCCACAACCCTCTGCAC-3'     |           |         |        |
| <i>INSIG1</i>                 | S      | 5'-CATCTTTTCTCCGCCTGGT-3'          | 247       | 60      | Human  |
|                               | AS     | 5'-ATGTCCACCAAAGGCCCAAA-3'         |           |         |        |
| <i>INSIG2</i>                 | S      | 5'-GCGGGGGATTCTGGTAGG-3'           | 476       | 60      | Human  |
|                               | AS     | 5'-ACACCGCATTACACTGGACC-3'         |           |         |        |
| <i>LDLR</i>                   | S      | 5'-TGTTCCACGTCTGCAATGA-3'          | 298       | 60      | Human  |
|                               | AS     | 5'-GGATGAGGCTGGTGTACTCG-3'         |           |         |        |
| <i>LOX1</i>                   | S      | 5'-GGCATGCAATTATCCCAGGTG-3'        | 283       | 60      | Human  |
|                               | AS     | 5'-TGCCAGATCCAGTCTTGCG-3'          |           |         |        |
| <i>LXR<math>\alpha</math></i> | S      | 5'-ACTGATGTCCACGGATGC-3'           | 338       | 60      | Human  |
|                               | AS     | 5'-CACAGTGTTAGCGAGGGCT-3'          |           |         |        |
| <i>LXR<math>\beta</math></i>  | S      | 5'-CACAGTCACAGTCGAGTCA-3'          | 208       | 60      | Human  |
|                               | AS     | 5'-TCGGAGAAGGAGCGTTTGTT-3'         |           |         |        |
| <i>MMP1</i>                   | S      | 5'-GGAGGGGATGCTCATTTTGATG-3'       | 541       | 60      | Human  |
|                               | AS     | 5'-TAGGGAAGCCAAAGGAGCTGT-3'        |           |         |        |

|                               |    |                                |     |    |       |
|-------------------------------|----|--------------------------------|-----|----|-------|
| <i>MMP3</i>                   | S  | 5'-AATCCTACTGTTGCTGTGCGTG-3'   | 238 | 60 | Human |
|                               | AS | 5'-CAGAGTGTCGGAGTCCAGCTTC-3'   |     |    |       |
| <i>MSR1</i>                   | S  | 5'-CCAATGAGAGGGATGAGAACTG-3'   | 129 | 60 | Human |
|                               | AS | 5'-GCTCAATGACAGCTTTGCTTC-3'    |     |    |       |
| <i>PTGS2</i>                  | S  | 5'-AATCCTTGCTGTTCCACCCATG-3'   | 329 | 60 | Human |
|                               | AS | 5'-AAGGGAGTCCGGGCAATCATCAGG-3' |     |    |       |
| <i>ROR<math>\alpha</math></i> | S  | 5'-GCAGATAACGTGGCAGACCT-3'     | 412 | 60 | Human |
|                               | AS | 5'-GCGATCCGCTGACATCAGTA-3'     |     |    |       |
| <i>ROR<math>\beta</math></i>  | S  | 5'-GGGTTATTACAACGTCGATTCCG-3'  | 358 | 60 | Human |
|                               | AS | 5'-CGTATTGGATGGCGTGAGTG-3'     |     |    |       |
| <i>ROR<math>\gamma</math></i> | S  | 5'-GCTCTGGGCCCTCATATTC-3'      | 315 | 60 | Human |
|                               | AS | 5'-TGGCATGTCTCCCTGTAGG-3'      |     |    |       |
| <i>SREBF1</i>                 | S  | 5'-CTGTTGGTGCTCGTCTCCTT-3'     | 214 | 60 | Human |
|                               | AS | 5'-CTACAAGCCAGGTCCAGGTG-3'     |     |    |       |
| <i>SREBF2</i>                 | S  | 5'-CAACTCCTATTCTTCAGCCCCG-3'   | 460 | 60 | Human |
|                               | AS | 5'-CGTCTGGATAGGGTGGTGA-3'      |     |    |       |
| <i>TLR4</i>                   | S  | 5'-AACCTCCCCTTCTCAACCAA-3'     | 496 | 60 | Human |
|                               | AS | 5'-TCATAGGGTTCAGGGACAGGT-3'    |     |    |       |

AT, annealing temperature; S, sense; AS, antisense.
